# Supplementary material for: Encapsulation and functionalization of nanoparticles in crosslinked resorcinarene shells
Source: Royal Society of Chemistry journal article supplement (doi:10.1039/b614295h), 2006-11-03

## Encapsulation and Functionalization of Nanoparticles in Crosslinked Resorcinarene Shells: Electronic Supplementary Information

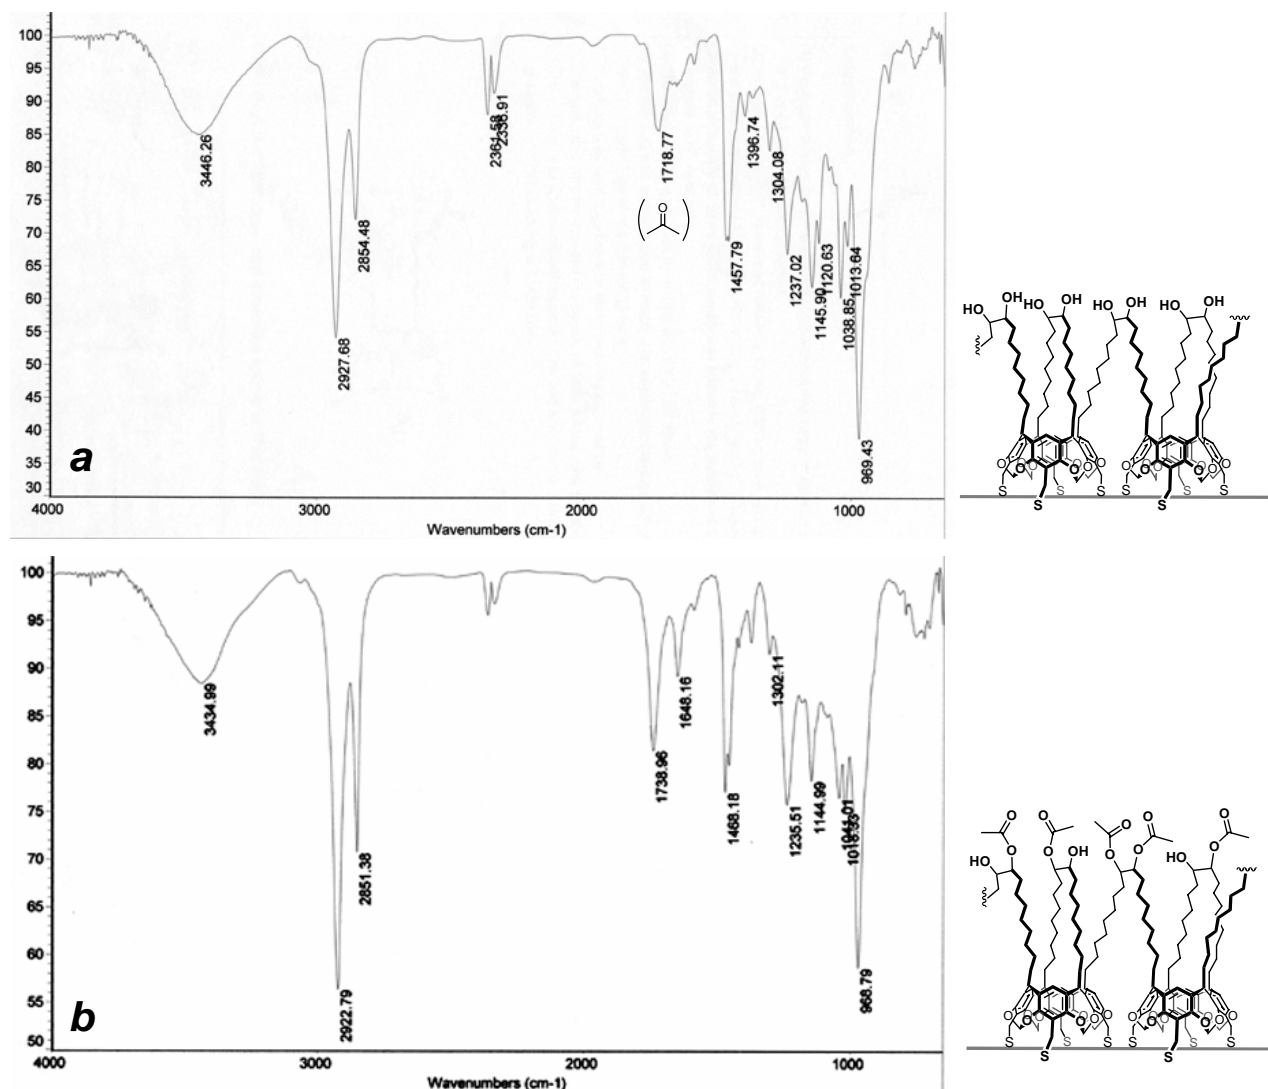

**Figure S1.** Transmission IR spectra (KBr pellets) of functionalized nanoparticles encapsulated in crosslinked monolayers of tetrabenzylthiol **4**. *a*, after recovery from OsO<sub>4</sub> and NMO in acetone. Peak at 1718 cm<sup>-1</sup> due to residual solvent. *b*, after recovery from Ac<sub>2</sub>O and DMAP in pyridine.

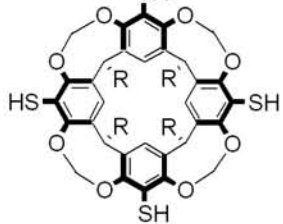

**3** ( $\text{R} = (\text{CH}_2)_8\text{CH}=\text{CH}_2$ )  
 ( $\text{CDCl}_3$ , 300 MHz)

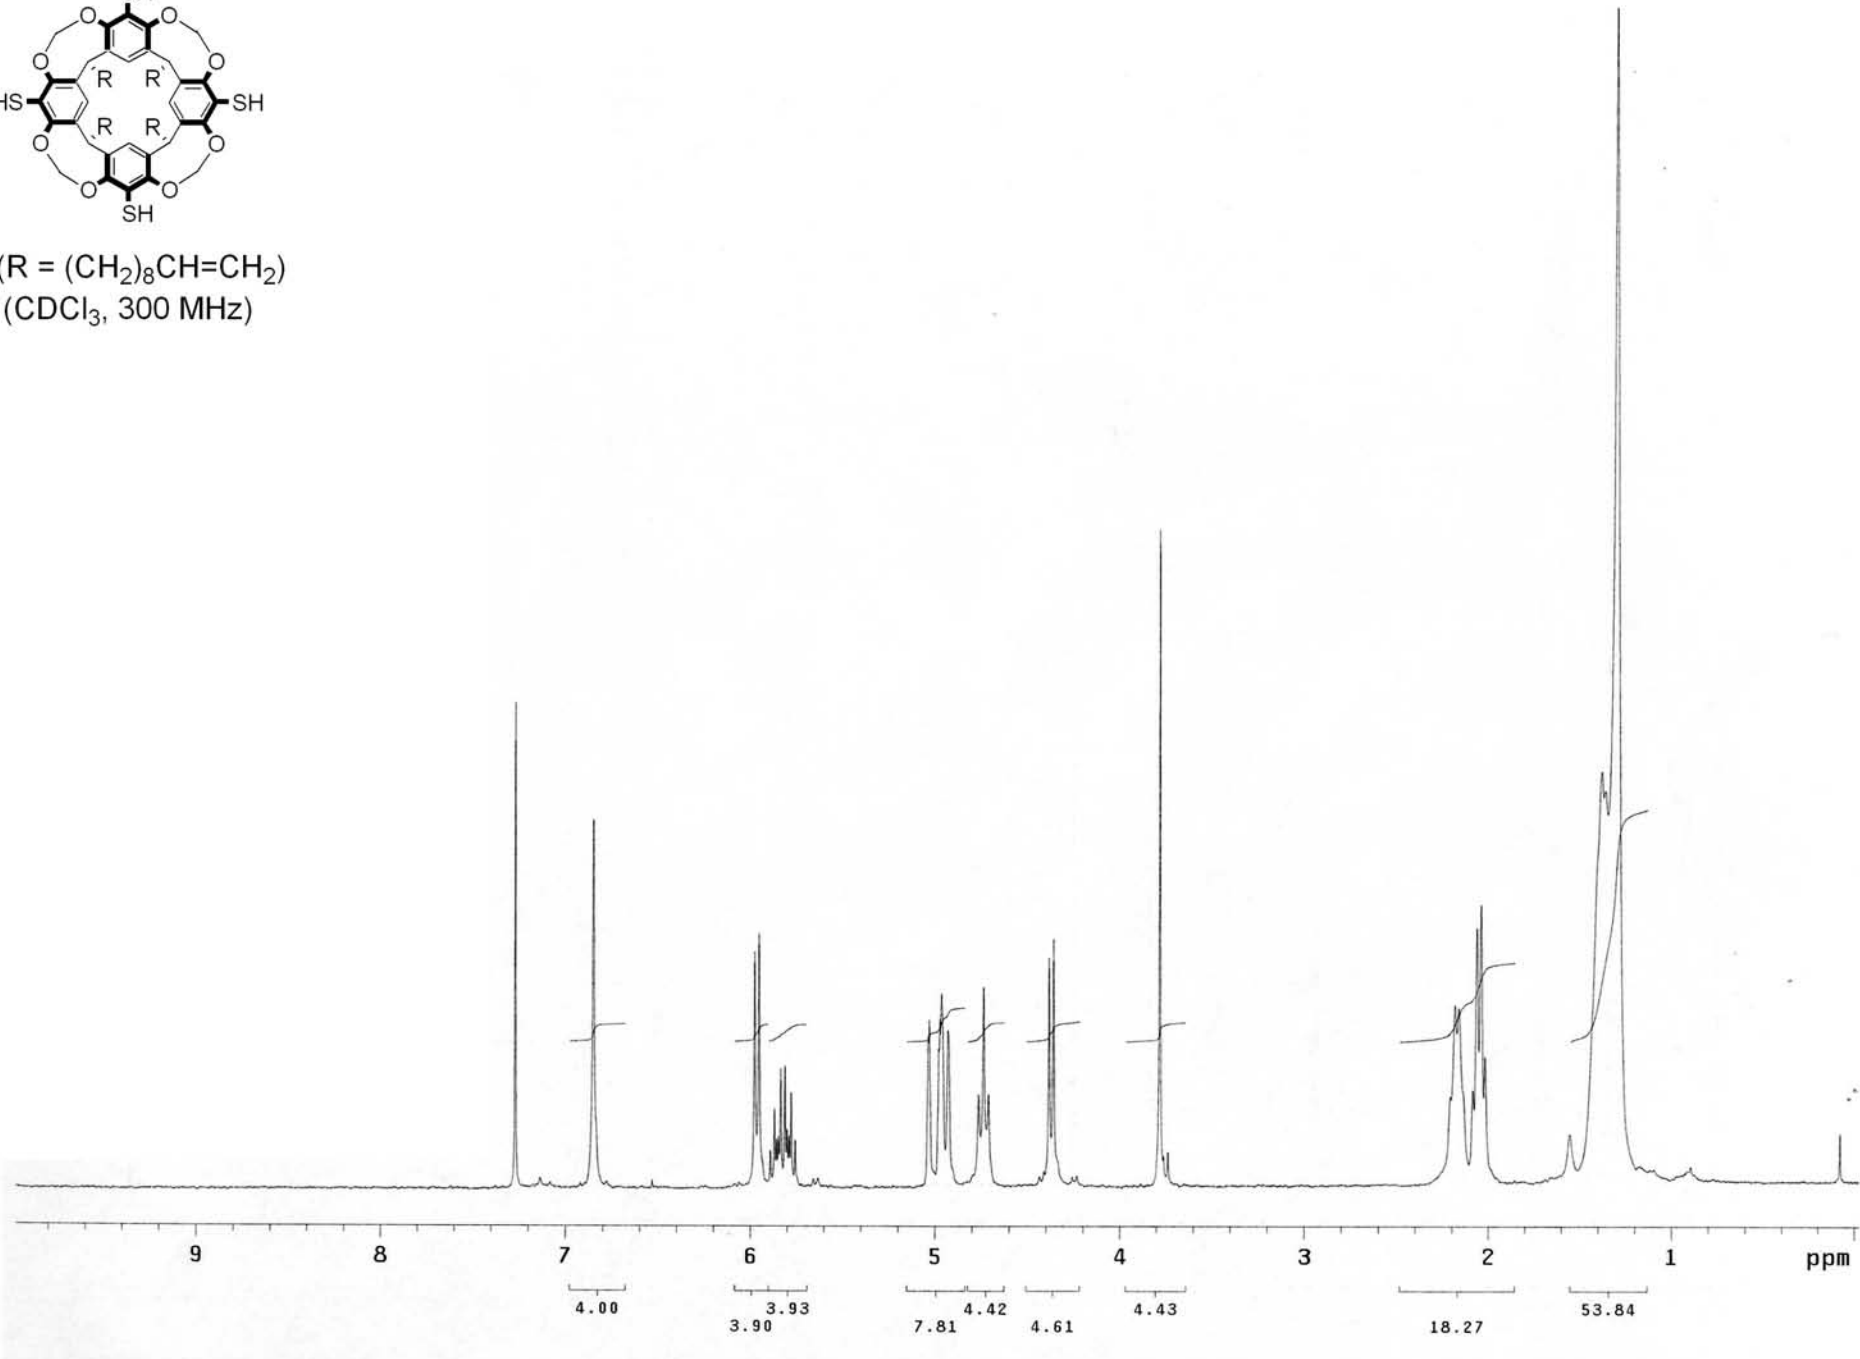

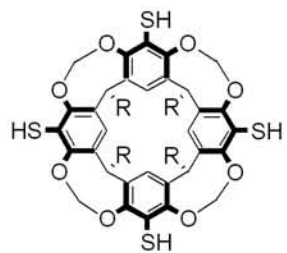

**3** (R = (CH<sub>2</sub>)<sub>8</sub>CH=CH<sub>2</sub>)  
(CDCl<sub>3</sub>, 75 MHz)

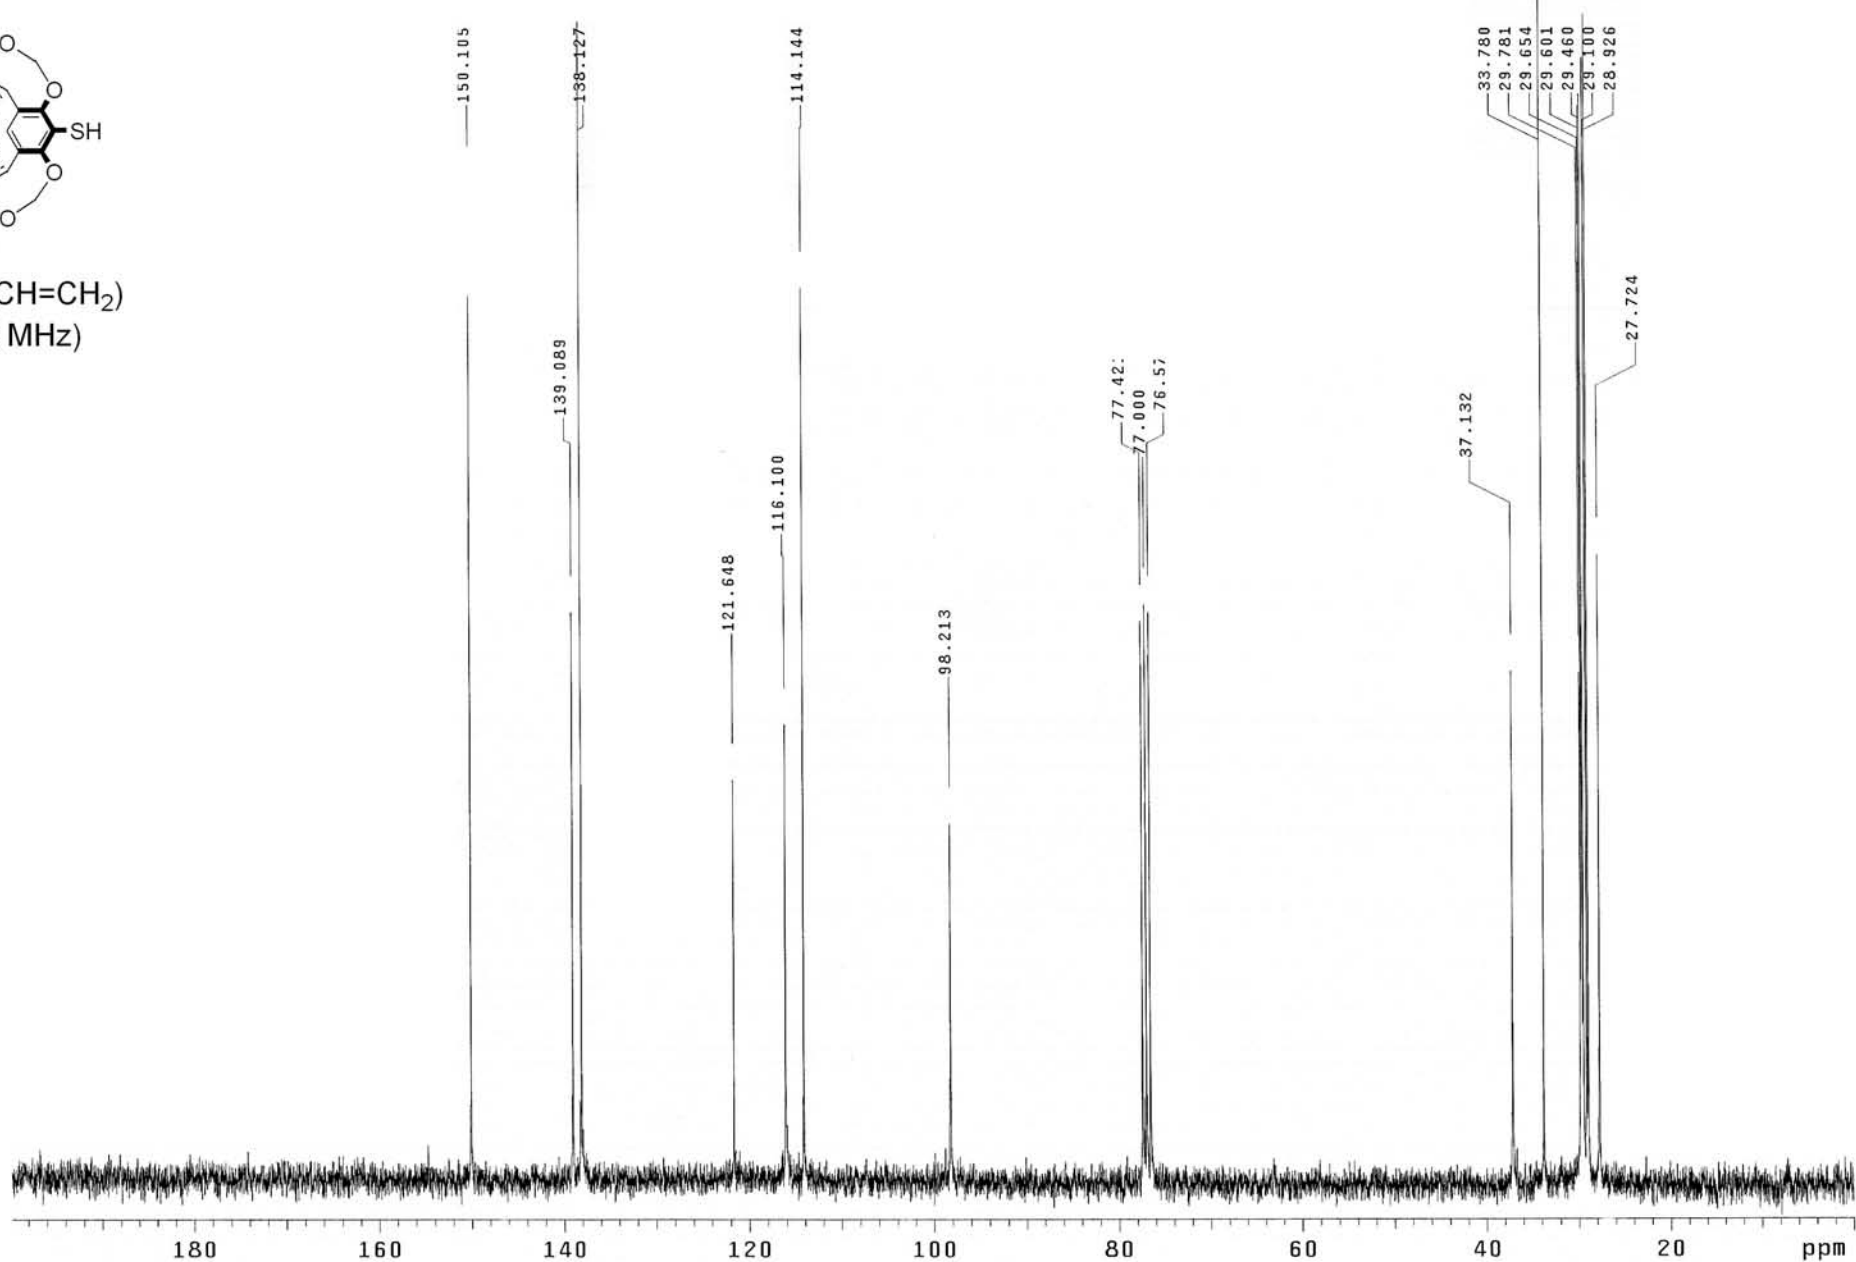

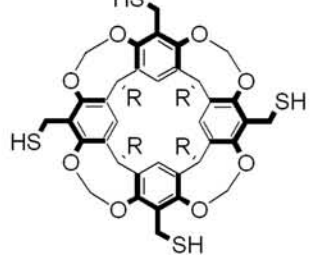

**4** ( $\text{R} = (\text{CH}_2)_8\text{CH}=\text{CH}_2$ )  
( $\text{CDCl}_3$ , 300 MHz)

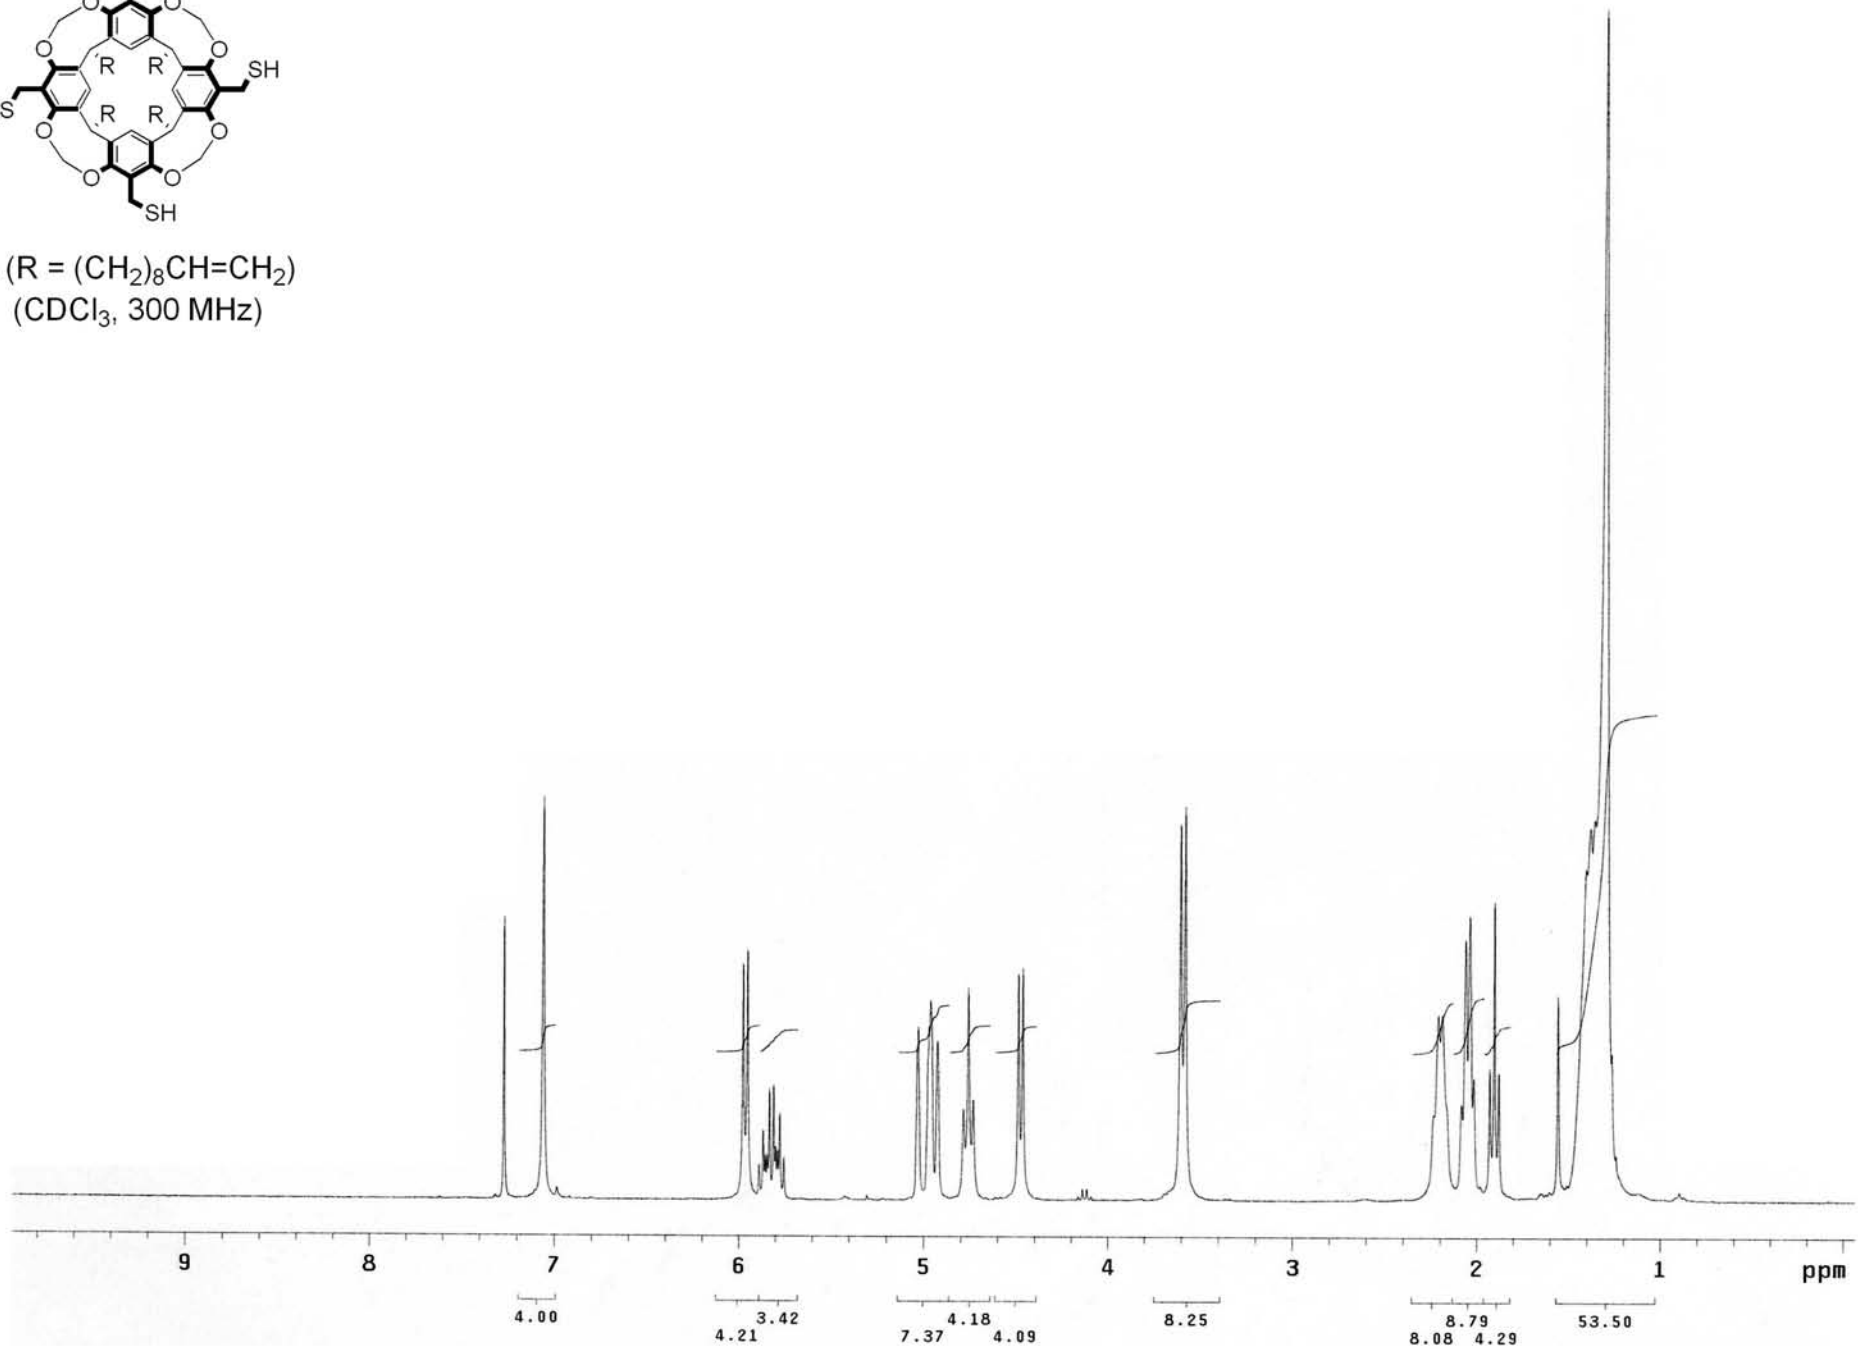

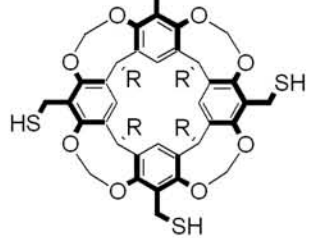

**4** (R = (CH<sub>2</sub>)<sub>8</sub>CH=CH<sub>2</sub>)  
(CDCl<sub>3</sub>, 75 MHz)

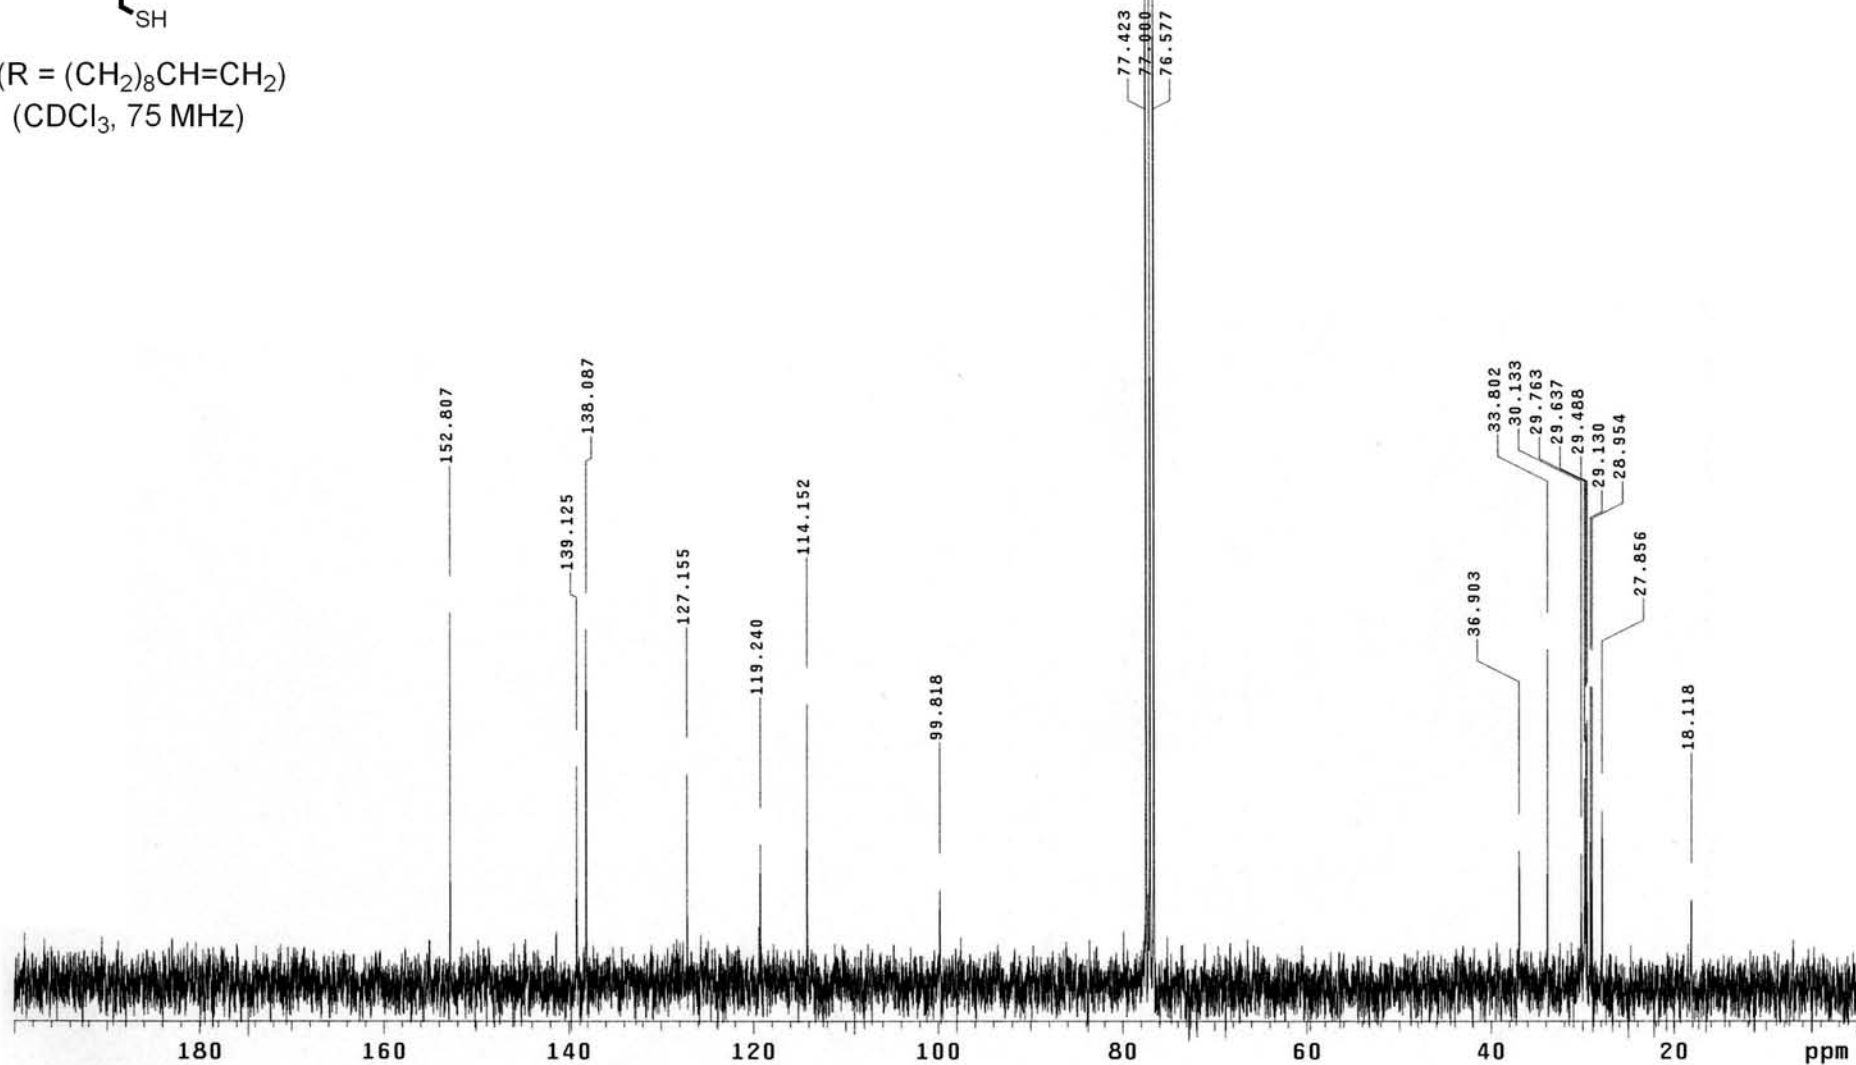

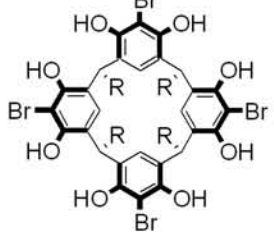

**6** ( $R = (CH_2)_8CH=CH_2$ )  
(DMSO- $d_6$ , 300 MHz)

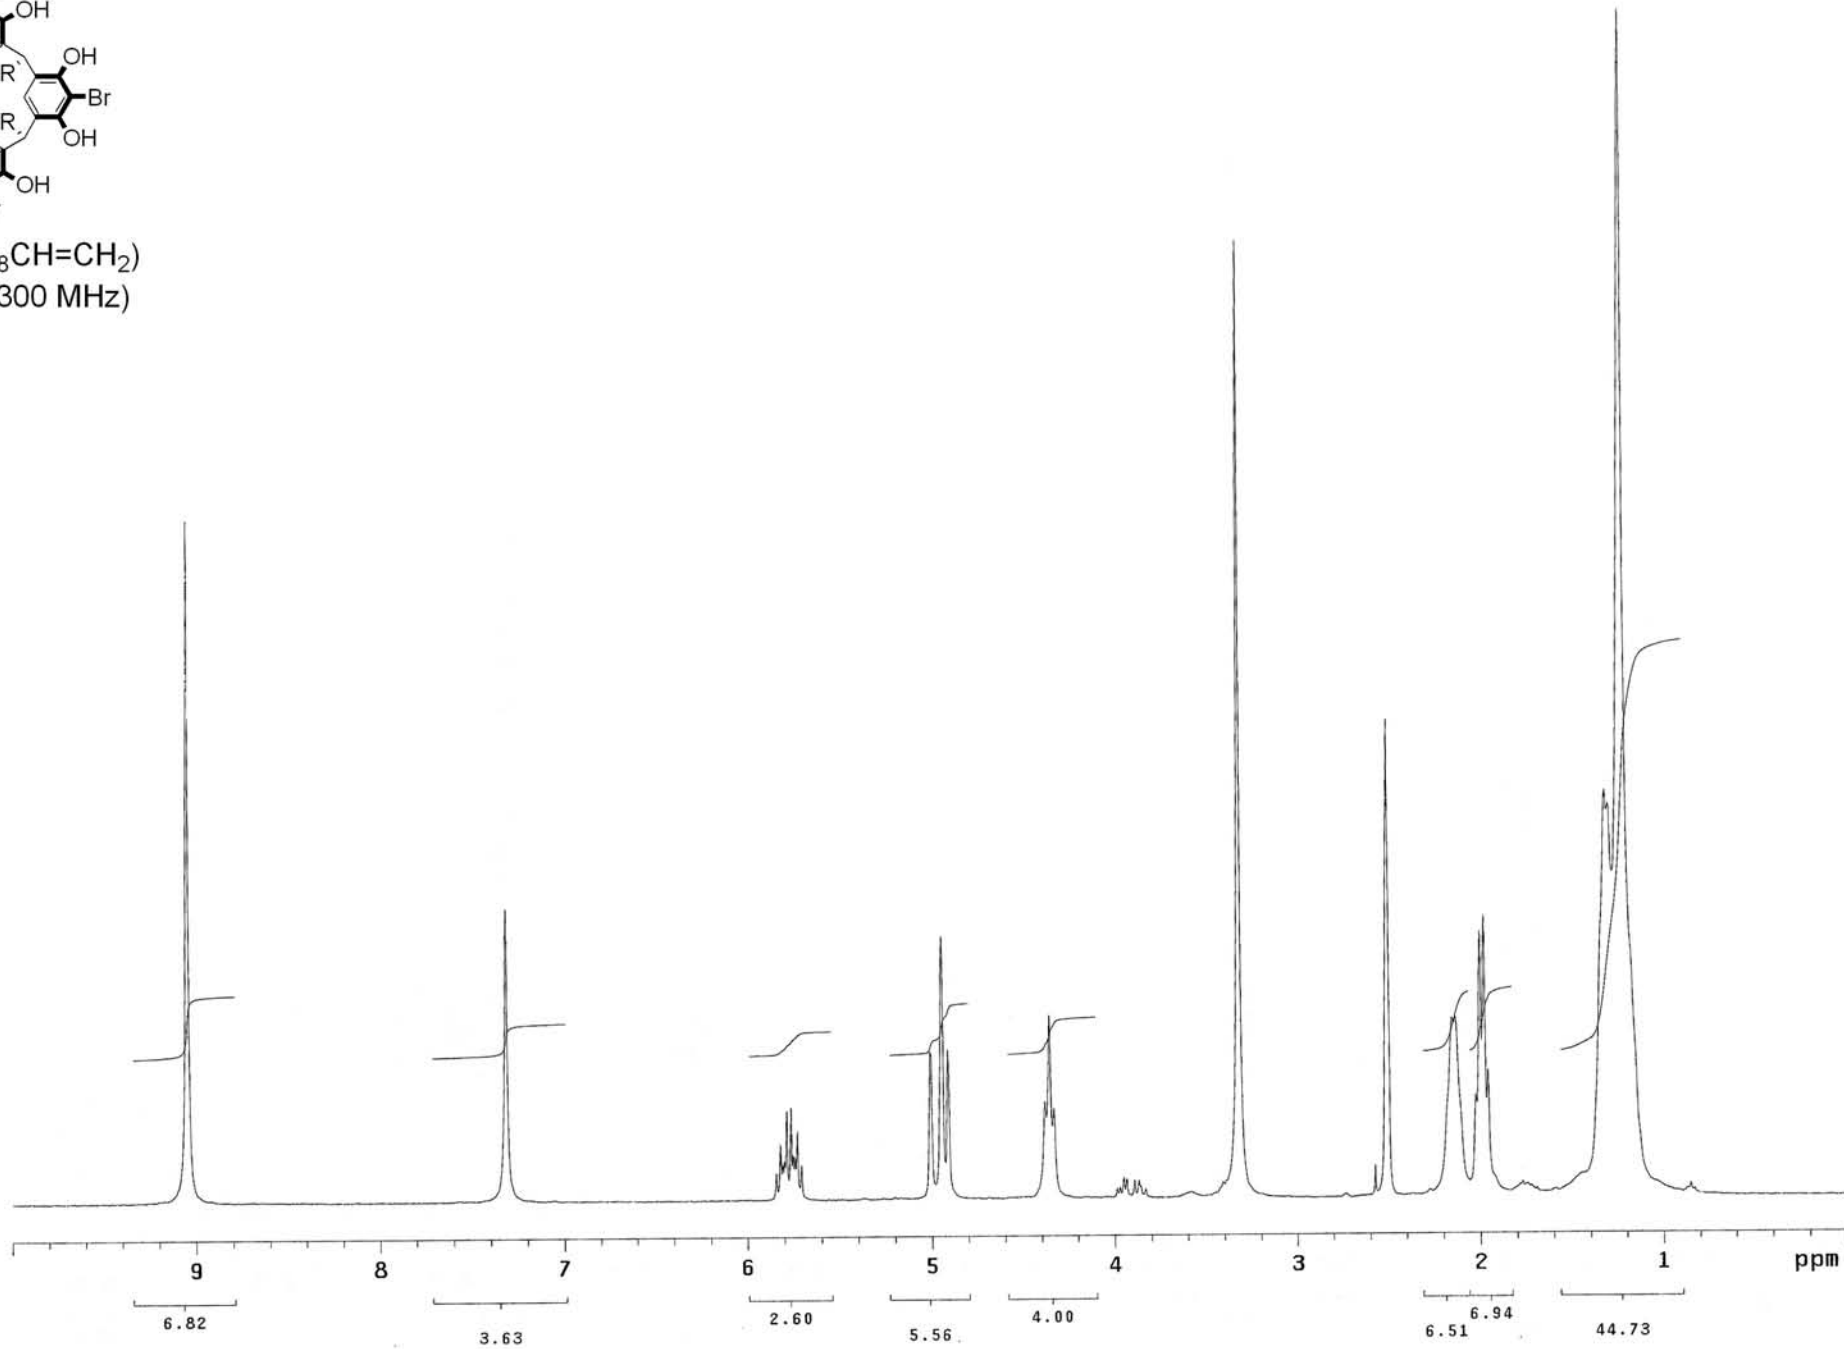

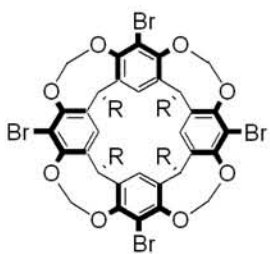

**7** (R = (CH<sub>2</sub>)<sub>8</sub>CH=CH<sub>2</sub>)  
(CDCl<sub>3</sub>, 300 MHz)

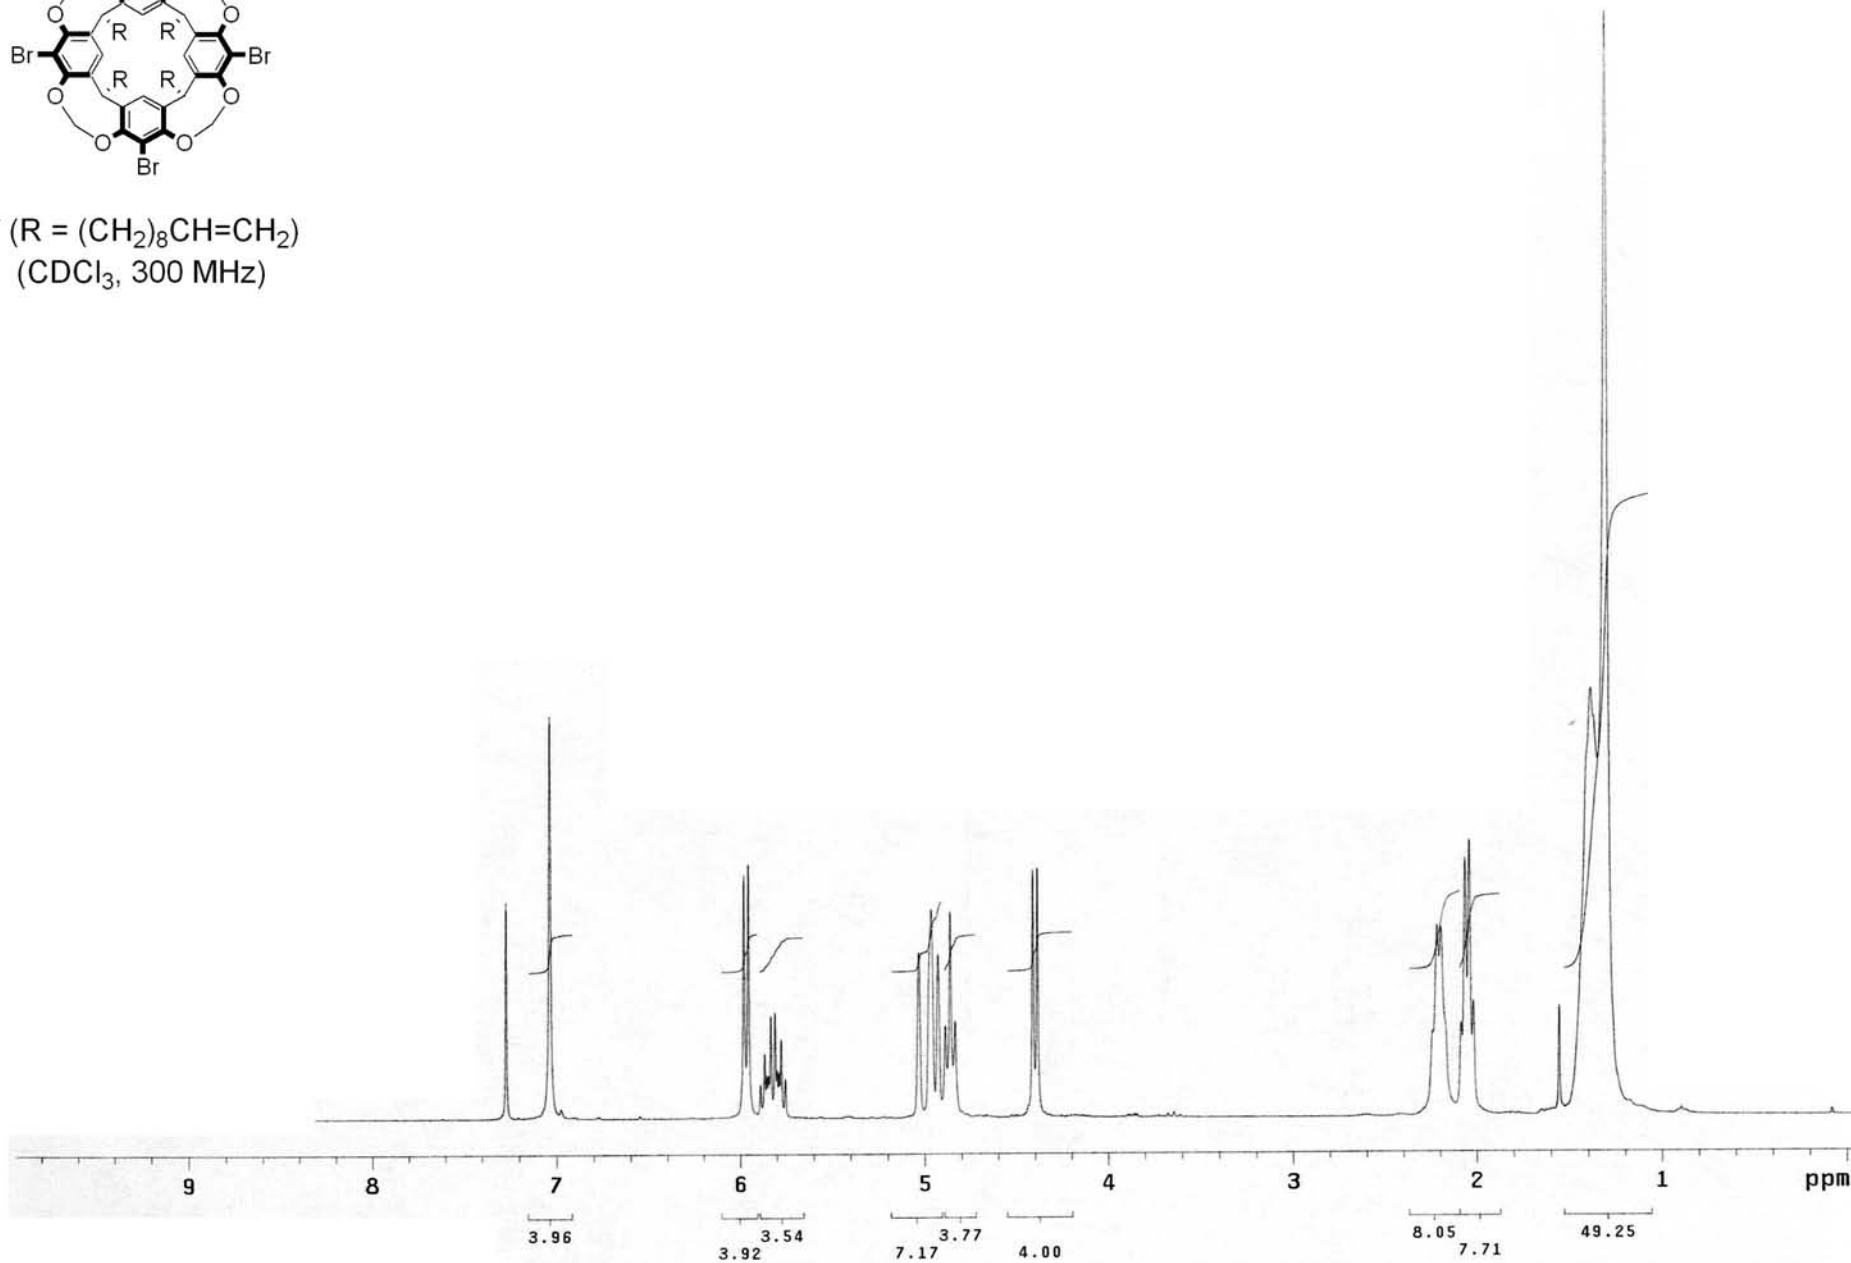

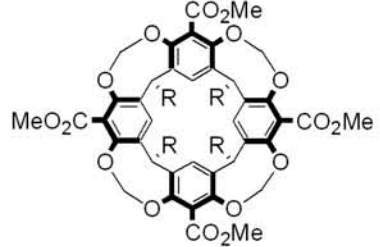

**8** (R = (CH<sub>2</sub>)<sub>8</sub>CH=CH<sub>2</sub>)  
(CDCl<sub>3</sub>, 300 MHz)

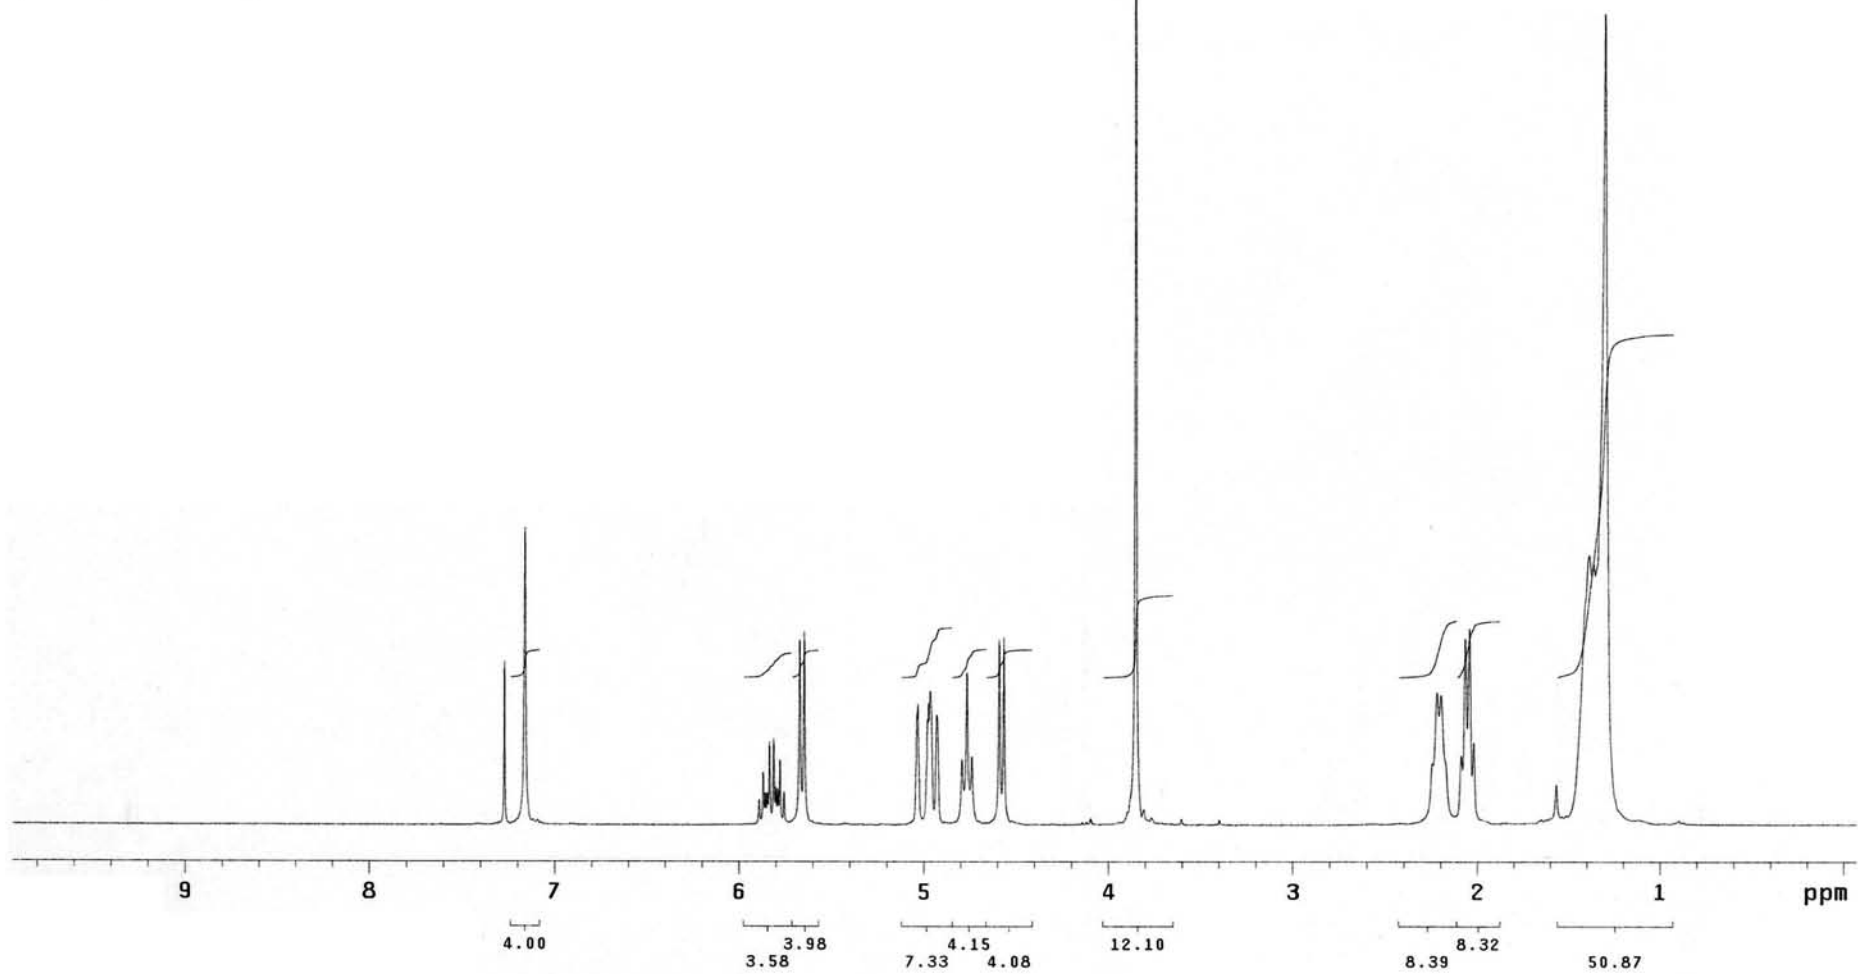



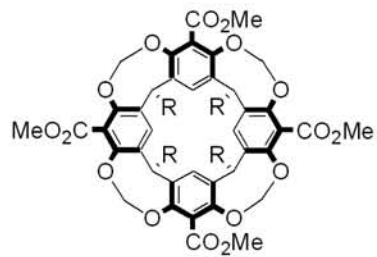

**8** ( $\text{R} = (\text{CH}_2)_8\text{CH}=\text{CH}_2$ )  
 ( $\text{CDCl}_3$ , 75 MHz)

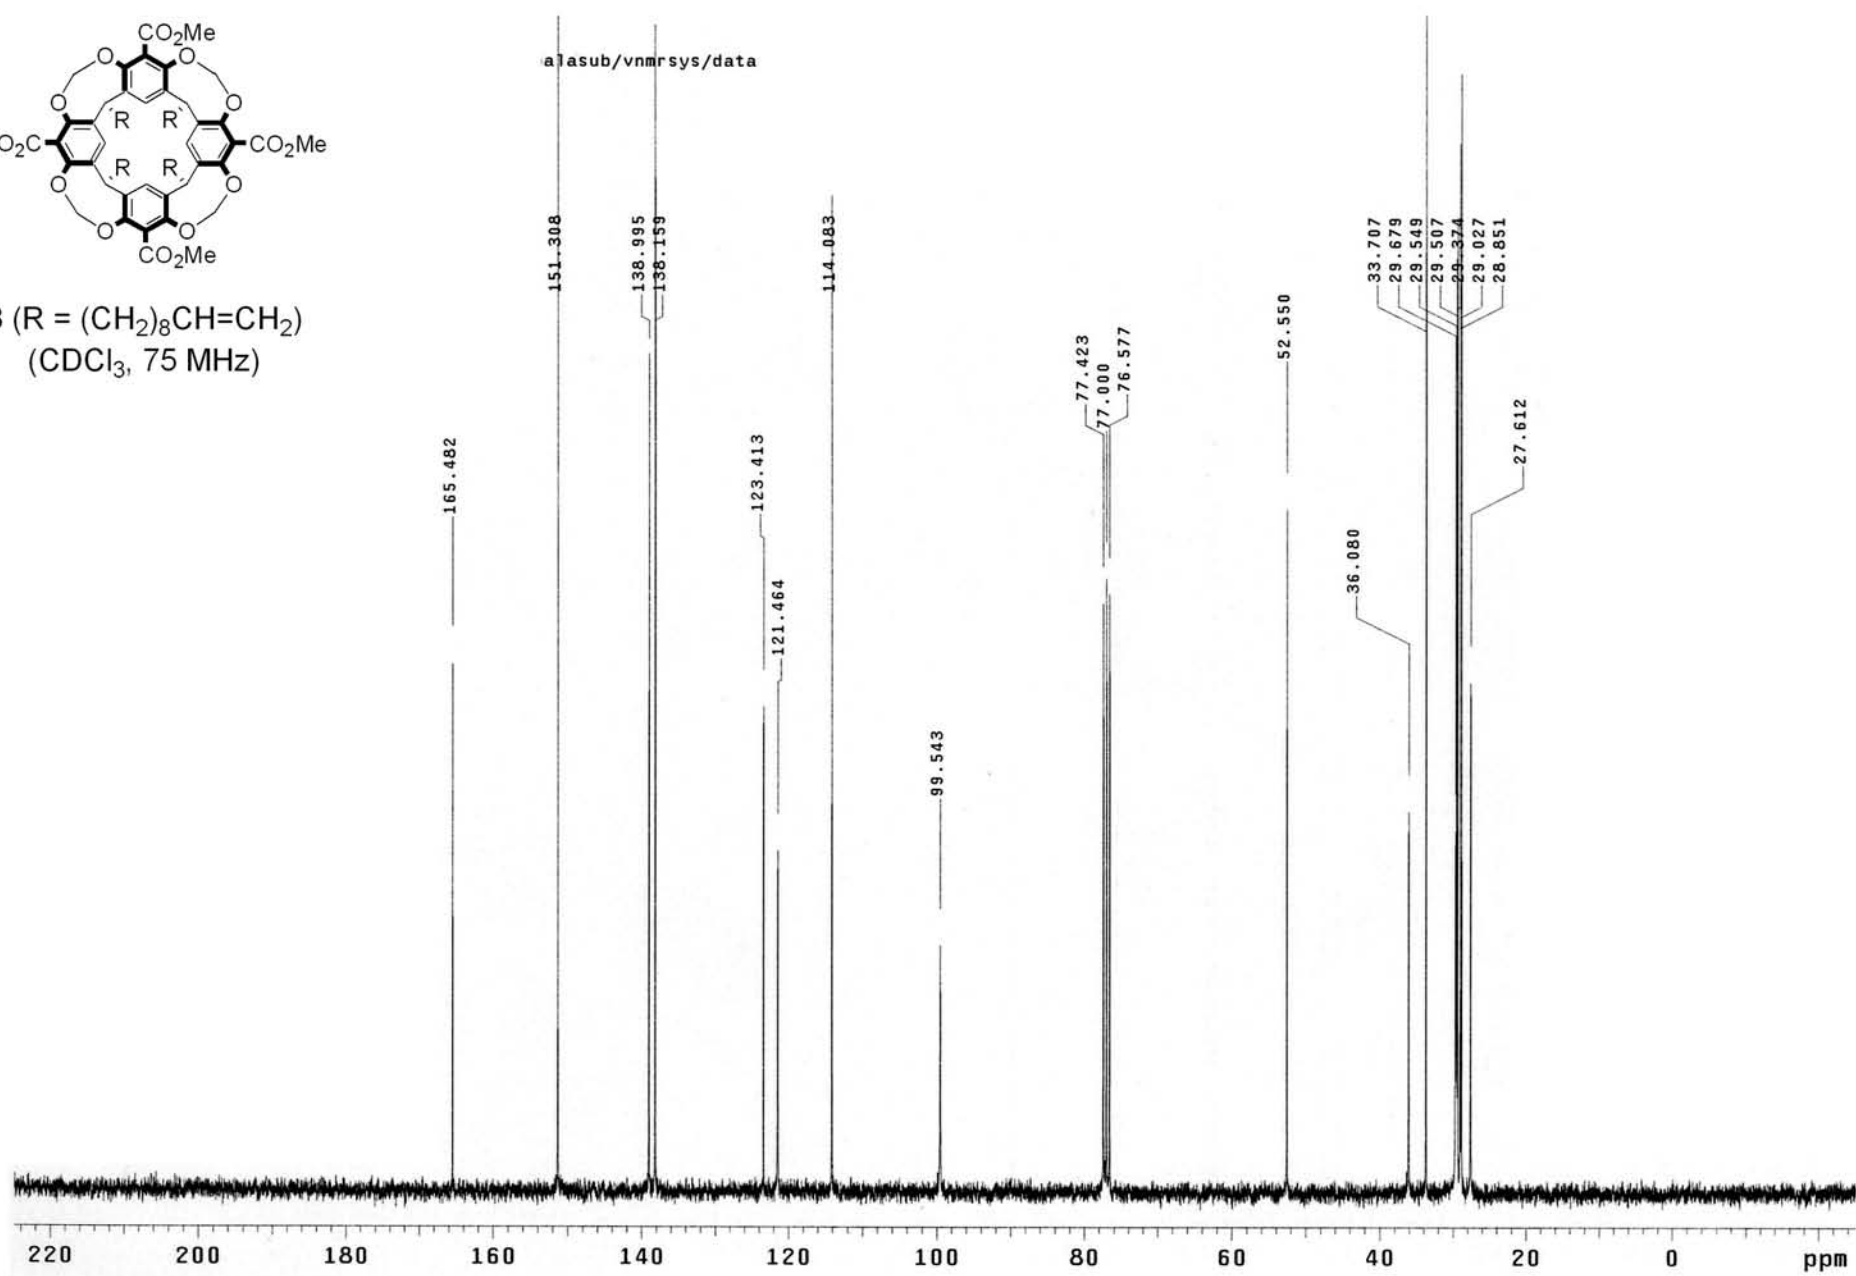

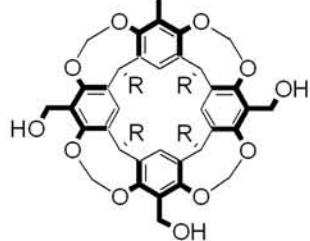

**9** (R = (CH<sub>2</sub>)<sub>8</sub>CH=CH<sub>2</sub>)  
(CDCl<sub>3</sub>, 300 MHz)

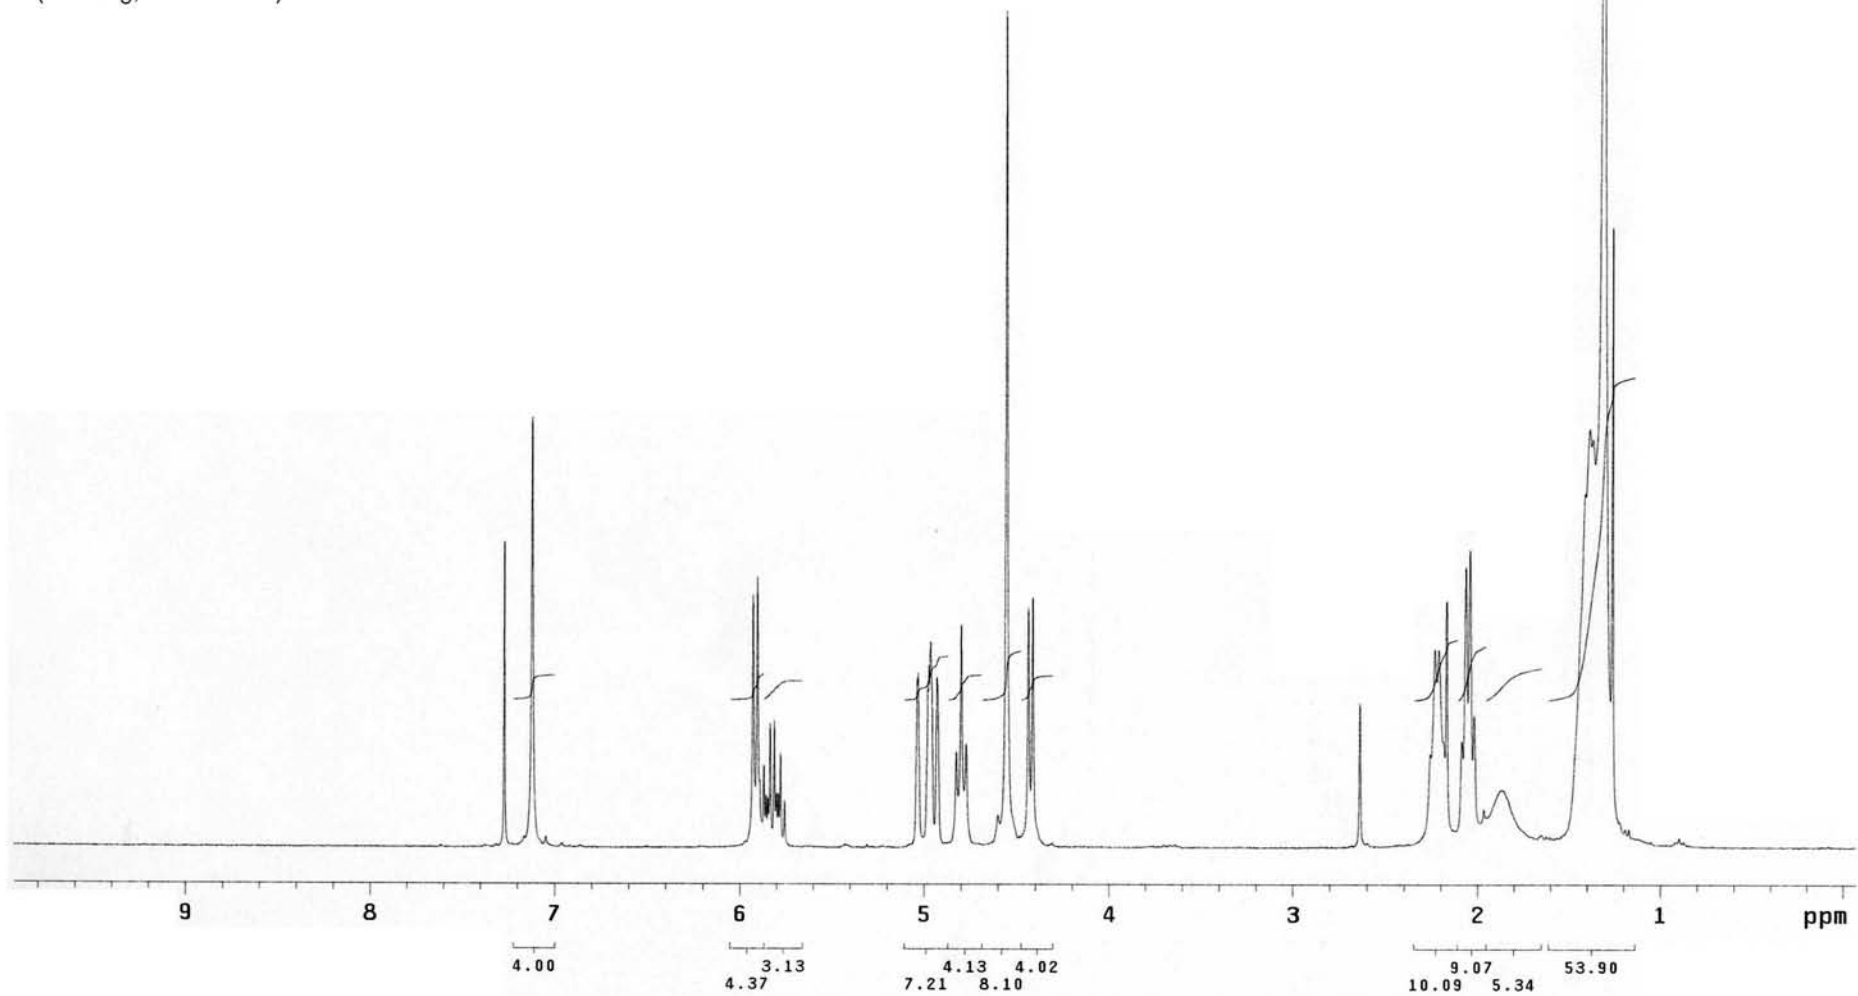

Supplement: b614295h.pdf [file b614295h.pdf]
